# Supplementary material for: Pharmaceutical Oral Formulation of Methionine as a Pediatric Treatment in Inherited Metabolic Disease
Source: MDPI journal article supplement (doi:10.3390/pharmaceutics15030957), 2023-03-16
Supplement: s1 [file s1]

# Supplementary Materials: Pharmaceutical Oral Formulation of Methionine as a Pediatric Treatment in Inherited Metabolic Disease

Benjamin Querin, Arnaud Schweitzer-Chaput, Salvatore Cisternino, Sylvain Auvity, Anne-Sophie Fauqueur, Abdel Negbane, Alice Hadchouel, Joël Schlatter and Camille Cotteret

**Table S1.** Result of the study of aromas on a panel of five adults using a subjective scale from 1 to 5; 5 being the best score.

| Test subject | Litchi flavor | Cotton candy flavor | Orange flavor | Strawberry flavor |
|--------------|---------------|---------------------|---------------|-------------------|
| A            | 1             | 2                   | 2             | 4                 |
| B            | 1             | 1                   | 3             | 5                 |
| C            | 1             | 2                   | 2             | 5                 |
| D            | 1             | 3                   | 1             | 5                 |
| E            | 1             | 1                   | 2             | 4                 |
| Mean         | 1             | 2                   | 2             | 5                 |

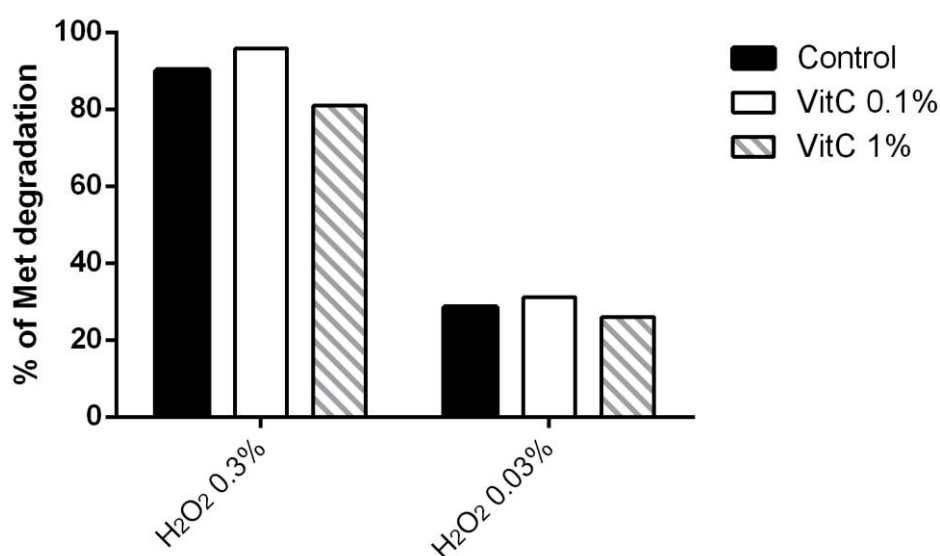

**Figure S1.** Percentage of Methionine (Met) degradation less than 15 min after reaction with H<sub>2</sub>O<sub>2</sub> 0.3% or H<sub>2</sub>O<sub>2</sub> 0.03% without (control), and with 0.1% or 1% of vitamin C (Vit C).

**Table S2.** Result of acceptability parents survey after at least one year of use by their children.

| Item                                                                                                                                        | Survey 1           | Survey 2           | Survey 3           | Survey 4         | Survey 5         | Survey 6  | Survey 7 | Results<br>(mean $\pm$ SD) |
|---------------------------------------------------------------------------------------------------------------------------------------------|--------------------|--------------------|--------------------|------------------|------------------|-----------|----------|----------------------------|
| Age                                                                                                                                         | 4 years 4 months   |                    | 2 years 11 months  | 2 years 3 months | 3 years 9 months | 20 months | 6 years  |                            |
| How long has your child been taking the methionine syrup? (month)                                                                           | 12                 | 12                 | 13                 | 17               | 14               | 15        | 12       | 13.6 $\pm$ 1.9             |
| Was your child taking methionine capsules before using the syrup?                                                                           | Yes                | Yes                | Yes                | No               | Yes              | No        | Yes      |                            |
| If so, do you prefer methionine syrup or capsule?                                                                                           | Syrup              | Syrup              | Syrup              | -                | Syrup            | -         | Syrup    |                            |
| If so, on a scale of 1 to 7 symbolized by the facial expressions below, how would you rate your child's enjoyment of methionine capsules?   | -                  | -                  | -                  | -                | 1                | -         | 5        |                            |
| Give a score out of 5, where 1 is the worst score                                                                                           |                    |                    |                    |                  |                  |           |          |                            |
| Are you satisfied with the ease of use of the syrup?                                                                                        | 4                  | 4                  | 5                  | 5                | 5                | 5         | 5        | 4.7 $\pm$ 0.5              |
| Give a score out of 5, where 1 is the worst score                                                                                           |                    |                    |                    |                  |                  |           |          |                            |
| How would you rate the smell of methionine syrup?                                                                                           | 3                  | 3                  | 5                  | 3                | 2                | 1         | 5        | 3.1 $\pm$ 1.5              |
| Give a score out of 5, where 1 is the worst score                                                                                           |                    |                    |                    |                  |                  |           |          |                            |
| Is Strawberry Taste acceptable or not for your child?                                                                                       |                    |                    |                    | Yes              | Yes              | Yes       | Yes      |                            |
| Does your child take a drink or food immediately after taking the methionine syrup to eliminate the taste of the syrup?                     | Gastrostomy intake | Gastrostomy intake | Gastrostomy intake | No               | Yes              | Yes       | Yes      |                            |
| If yes, on a scale of 1 to 7 symbolized by the facial expressions below, how would you rate your child's appreciation of methionine syrups? |                    |                    |                    | 2                | 3                | 6         | 3        | 3.5 $\pm$ 1.7              |

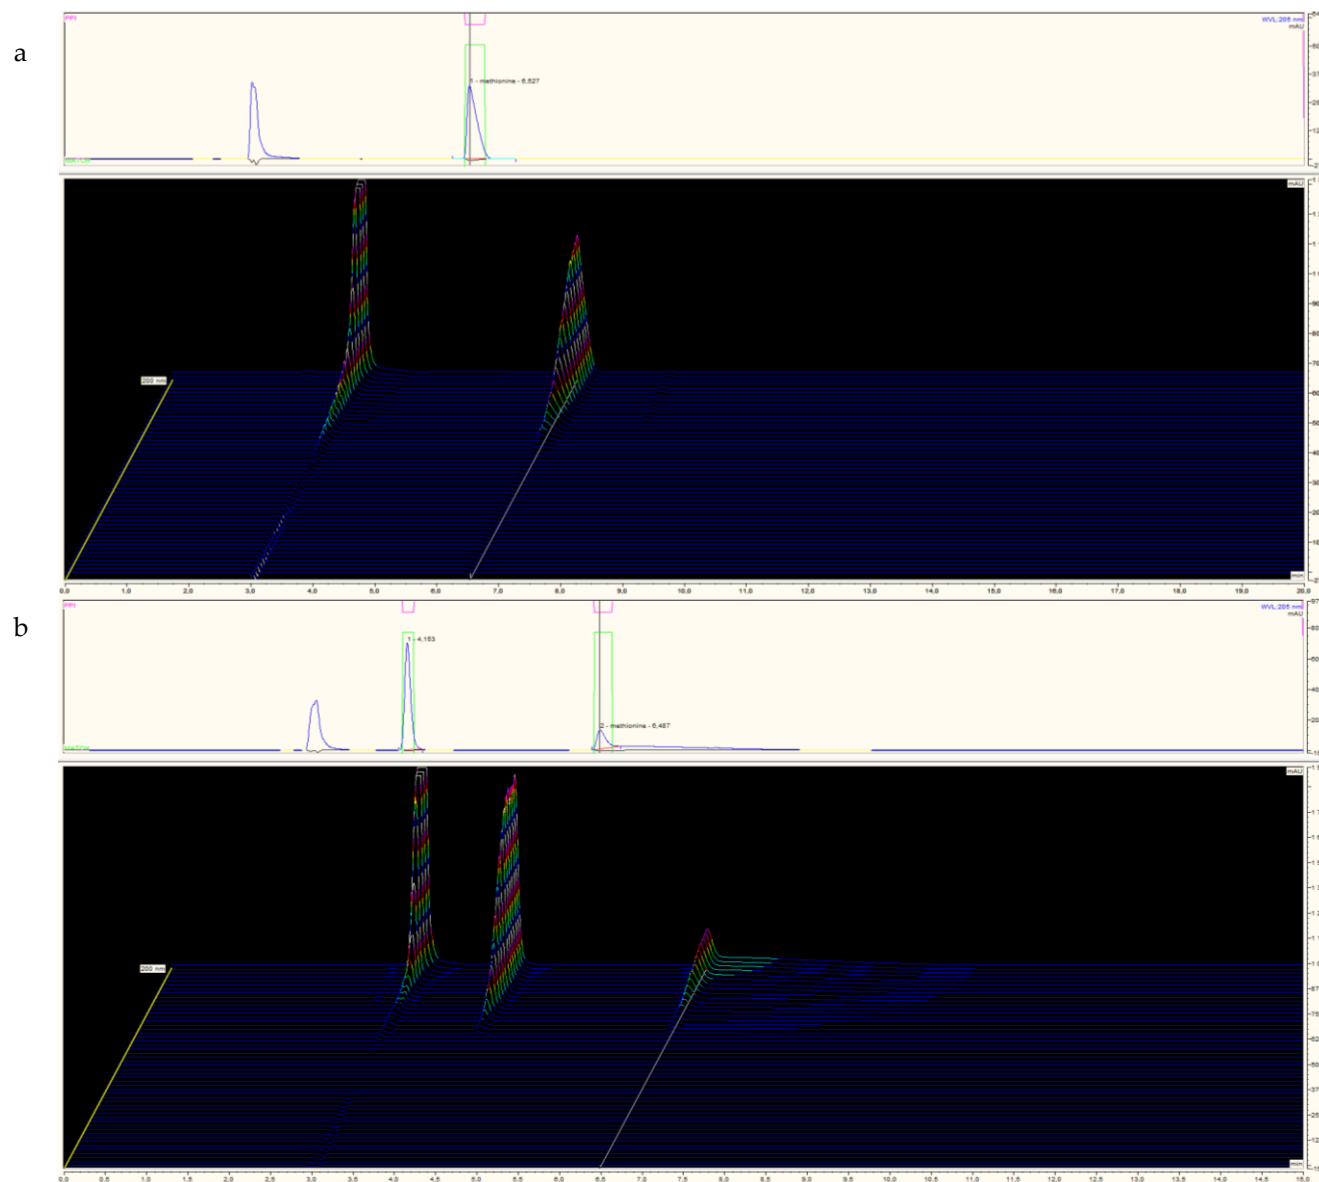

**Figure S2.** (a) Example of Chromatogram and 3D-plot (200–300 nm) of methionine suspension in 0.1M HCl less than 15 minutes after mixing (Met retention time ~6.5 min). (b) Chromatogram and 3D-plot (200–300 nm) of methionine suspension in 0.1M HCl after 72h at 70°C with a degradation product detected at 4.2 min
